# Supplementary material for: Structural basis for backtracking by the SARS-CoV-2 replication-transcription complex
Source: PubMed Central journal article supplement — bioRxiv. 2021 Mar 14:2021.03.13.435256. Preprint. [Version 1] doi: 10.1101/2021.03.13.435256 (PMC7987028; doi:10.1101/2021.03.13.435256), 2021-03-14
Supplement: NIHPP2021.03.13.435256-supplement-1.pdf [file NIHPP2021.03.13.435256-supplement-1.pdf]

597 **Supplementary Information Text**

598

599 **METHODS**

600 Structural biology software was accessed through the SBGrid consortium (1).

601 **Protein expression and purification.**

602 *SARS-CoV-2 nsp12*. SARS-CoV-2 nsp12 was expressed and purified as  
603 described (1). A pRSFDuet-1 plasmid expressing SARS-CoV-2 His<sub>6</sub>-SUMO-  
604 nsp12 (Addgene plasmid 159107) was transformed into *Escherichia coli* (*Eco*)  
605 BL21-CodonPlus cells (Agilent). Cells were grown, followed by the addition of  
606 isopropyl β-d-1-thiogalactopyranoside (IPTG) to induce protein expression  
607 overnight. Cells were collected by centrifugation, resuspended and lysed in a  
608 continuous-flow French press (Avestin). The lysate was cleared by centrifugation,  
609 loaded onto a HiTrap Heparin HP column (Cytiva), and then eluted using a salt  
610 gradient. The fractions containing nsp12 were pooled and loaded onto a HisTrap  
611 HP column (Cytiva), washed, and eluted. Eluted nsp12 was dialyzed overnight in  
612 the presence of His<sub>6</sub>-Ulp1 SUMO protease. Cleaved nsp12 was passed through  
613 a HisTrap HP column (Cytiva). Flow-through was collected, concentrated by  
614 centrifugal filtration (Amicon), and loaded on a Superdex 200 Hiload 16/600  
615 (Cytiva) for size-exclusion chromatography. Glycerol was added to the purified  
616 nsp12, aliquoted, flash frozen with liquid N<sub>2</sub>, and stored at -80°C.

617 *SARS-CoV-2 nsp7/8*. SARS-CoV-2 nsp7/8 was expressed and purified as  
618 described (1). The pCDFDuet-1 plasmid expressing SARS-CoV-2 His<sub>6</sub>-ppx-  
619 nsp7/8 (ppx is a Prescission Protease cleavage site; Addgene plasmid 159092)  
620 was transformed into *Eco* BL21(DE3). Cells were grown and protein expression  
621 was induced overnight by the addition of IPTG. Cells were collected by  
622 centrifugation, resuspended, and lysed in a continuous-flow French press  
623 (Avestin). The lysate was cleared by centrifugation, then loaded onto a HisTrap  
624 HP column (Cytiva), washed, and eluted. Eluted nsp7/8 was dialyzed overnight in  
625 the presence of His<sub>6</sub>-Prescission Protease to cleave the His<sub>6</sub>-tag. Cleaved nsp7/8  
626 was passed through a HisTrap HP column (Cytiva). Flow-through was collected,  
627 concentrated by centrifugal filtration (Amicon), and loaded onto a Superdex 75  
628 Hiload 16/600 (Cytiva). Glycerol was added to the purified nsp7/8, aliquoted,  
629 flash frozen with liquid N<sub>2</sub>, and stored at -80°C.

630 SARS-CoV-2 nsp13. SARS-CoV-2 nsp13 was expressed and purified as  
631 described (1). The pet28 plasmid containing SARS-CoV-2 His<sub>6</sub>-ppx-nsp13  
632 (Addgene plasmid 159390) was transformed into *Eco* Rosetta(DE3) (Novagen).  
633 Cells were grown, followed by the addition of IPTG to induce protein expression  
634 overnight. Cells were collected by centrifugation, resuspended, and lysed in a  
635 continuous-flow French press (Avestin). The lysate was cleared by centrifugation,  
636 then loaded onto a HisTrap HP column (Cytiva), washed, and eluted. Eluted  
637 nsp13 was dialyzed overnight in the presence of His<sub>6</sub>-PreScission Protease to  
638 cleave His<sub>6</sub>-tag. Cleaved nsp13 was passed through a HisTrap HP column  
639 (Cytiva). Flow-through was collected, concentrated by centrifugal filtration  
640 (Amicon), and loaded onto a Superdex 200 Hiload 16/600 (Cytiva). Glycerol was  
641 added to the purified nsp13, aliquoted, flash frozen with liquid N<sub>2</sub>, and stored at -  
642 80°C.

643

644 **Native electrophoretic mobility shift assays.** Nsp12 or nsp12-D760A were  
645 incubated with 3-fold molar excess of nsp7/8 in transcription buffer (120 mM K-  
646 acetate, 20 mM HEPES pH 8, 10 mM MgCl<sub>2</sub>, 2 mM DTT) to assemble holo-RdRp  
647 (2 μM final). The resulting complex was incubated with 1 μM of annealed RNA  
648 scaffold (Horizon Discovery) for 5 minutes at 30°C. Nsp13 and pre-mixed ADP  
649 and AlF<sub>3</sub> (Sigma-Aldrich) were added to a final concentration of 2 μM and 2 mM,  
650 respectively, and incubated for an additional 5 minutes at 30°C. Reactions were  
651 analyzed by native gel electrophoresis on a 4.5% polyacrylamide native gel  
652 (37.5:1 acrylamide:bis-acrylamide) in 1X TBE (89 mM Tris, 89 mM boric acid,  
653 1 mM EDTA) at 4°C. The gel was stained with Gel-Red (Biotium).

654

655 **Native mass spectrometry (nMS) analysis.** The reconstituted sample  
656 containing 4 μM RTC and 8 μM nsp13 incubated with 2 mM ADP-AlF<sub>3</sub> was  
657 buffer-exchanged into 150 mM ammonium acetate, 0.01% Tween-20, pH 7.5  
658 using a Zeba microspin desalting column with a 40 kDa MWCO (ThermoFisher  
659 Scientific). For nMS analysis, a 2–3 μL aliquot of the buffer-exchanged sample

660 was loaded into a gold-coated quartz capillary tip that was prepared in-house and  
661 then electrosprayed into an Exactive Plus with extended mass range (EMR)  
662 instrument (Thermo Fisher Scientific) with a static direct infusion nanospray  
663 source (2). The MS parameters used: spray voltage, 1.2 kV; capillary  
664 temperature, 150 °C; in-source dissociation, 0 V; S-lens RF level, 200; resolving  
665 power, 17,500 at  $m/z$  of 200; AGC target,  $1 \times 10^6$ ; maximum injection time,  
666 200 ms; number of microscans, 5; injection flatapole, 6 V; interflatapole, 4 V; bent  
667 flatapole, 4 V; high energy collision dissociation (HCD), 200 V; ultrahigh vacuum  
668 pressure,  $7.2 \times 10^{-10}$  mbar; total number of scans, at least 100. Mass calibration  
669 in positive EMR mode was performed using cesium iodide. For data processing,  
670 the acquired MS spectra were visualized using Thermo Xcalibur Qual Browser  
671 (v. 4.2.47). MS spectra deconvolution was performed either manually or using  
672 the software UniDec v. 4.2.0 (3, 4). The following parameters were used for the  
673 UniDec processing:  $m/z$  range, 7,000 – 10,000 Th; background subtraction,  
674 subtract curved at 100; smooth charge state distribution, enabled; peak shape  
675 function, Gaussian; Beta Softmax distribution parameter, 20.

676 The expected masses for the component proteins based on previous nMS  
677 experiments (1) include nsp7: 9,137 Da; nsp8 (N-terminal Met lost): 21,881 Da;  
678 nsp13 (post-protease cleavage, has three  $Zn^{2+}$  ions coordinated with  
679 9 deprotonated cysteine residues): 67,464 Da, and nsp12 (has two  $Zn^{2+}$  ions  
680 coordinated with 6 deprotonated cysteine residues): 106,785 Da. The mass of  
681 the assembled RNA duplex scaffold is 30,512 Da.

682 Experimental masses were reported as the average mass  $\pm$  standard  
683 deviation (S.D.) across all the calculated mass values within the observed charge  
684 state series. Mass accuracies were calculated as the % difference between the  
685 measured and expected masses relative to the expected mass. The observed  
686 mass accuracies ranged from 0.016 – 0.035%.

687

688 **Preparation of SARS-CoV-2 nsp13-BTC<sub>5</sub> for Cryo-EM.** Purified nsp12 and  
689 nsp7/8 were mixed in a 1:3 molar ratio and incubated at 22° C for 15 minutes.

690 The mixture was buffer-exchanged into cryo-EM buffer (20 mM HEPES pH 8.0,  
691 150 mM K-acetate, 10 mM MgCl<sub>2</sub>, 1 mM DTT) using Zeba desalting columns  
692 (ThermoFisher Scientific) and incubated with annealed BTC<sub>5</sub>-scaffold (Fig. 1A) in  
693 a 1:1.5 molar ratio. Purified nsp13 was concentrated by centrifugal filtration  
694 (Amicon) and buffer exchanged into cryo-EM buffer using Zeba desalting  
695 columns. Buffer exchanged nsp13 was mixed with ADP and AlF<sub>3</sub> and then added  
696 to nsp7/8/12/RNA scaffold at a molar ratio of 1:1 with a final concentration of  
697 2 mM ADP-AlF<sub>3</sub>. Complex was incubated for 5 minutes at 30° C and further  
698 concentrated by centrifugal filtration (Amicon).

699

700 **Cryo-EM grid preparation.** Prior to grid freezing, 3-([3-  
701 cholamidopropyl]dimethylammonio)-2-hydroxy-1-propanesulfonate (CHAPSO,  
702 Anatrace) was added to the sample (8 mM final), resulting in a final complex  
703 concentration of 10 μM. The final buffer condition for the cryo-EM sample was  
704 20 mM HEPES pH 8.0, 150 mM K-acetate, 10 mM MgCl<sub>2</sub>, 1 mM DTT,  
705 2 mM ADP-AlF<sub>3</sub>, 8 mM CHAPSO. C-flat holey carbon grids (CF-1.2/1.3-4Au,  
706 Electron Microscopy Sciences) were glow-discharged for 20 s prior to the  
707 application of 3.5 μL of sample. Using a Vitrobot Mark IV (ThermoFisher  
708 Scientific), grids were blotted and plunge-frozen into liquid ethane with 90%  
709 chamber humidity at 4°C.

710

711 **Cryo-EM data acquisition and processing.** Structural biology software was  
712 accessed through the SBGrid consortium (5). Grids were imaged using a 300 kV  
713 Titan Krios (ThermoFisher Scientific) equipped with a K3 camera (Gatan) and a  
714 BioQuantum imaging filter (Gatan). Images were recorded using Legikon (6) with  
715 a pixel size of 1.065 Å/px (micrograph dimensions of 5,760 x 4,092 px) over a  
716 nominal defocus range of -0.8 μm to -2.5 μm and 30 eV slit width. Movies were  
717 recorded in "counting mode" (native K3 camera binning 2) with ~30 e-/px/s in  
718 dose-fractionation mode with subframes of 50 ms over a 2.5 s exposure (50  
719 frames) to give a total dose of ~66 e-/Å. Dose-fractionated movies were gain-

720 normalized, drift-corrected, summed, and dose-weighted using MotionCor2 (7).  
721 The contrast transfer function (CTF) was estimated for each summed image  
722 using the Patch CTF module in cryoSPARC v2.15.0 (8) Particles were picked  
723 and extracted from the dose-weighted images with box size of 256 px using  
724 cryoSPARC Blob Picker and Particle Extraction. The entire dataset consisted of  
725 10,685 motion-corrected images with 4,961,691 particles. Particles were sorted  
726 using cryoSPARC 2D classification (N=100), resulting in 2,412,034 curated  
727 particles. Initial models (Ref 1: decoy 1, Ref 2: complex, Ref 3: decoy 2;  
728 SI Appendix; Fig. S2) were generated using cryoSPARC *ab initio* Reconstruction  
729 on a subset of 85,398 particles. Particles were further curated using Ref 1-3 as  
730 3D templates for cryoSPARC Heterogeneous Refinement (N=6), resulting in the  
731 following: class1 (Ref 1), 258,097 particles; class2 (Ref 1), 263,966 particles;  
732 class3 (Ref 2), 668,743 particles; class4 (Ref 2), 665,480 particles; class5 (Ref  
733 3), 280,933 particles; class6 (Ref 3), 274,815 particles. Particles from class3 and  
734 class4 were combined and further curated with another round of Heterogeneous  
735 Refinement (N=6), resulting in the following: class1 (Ref 1), 67,639 particles;  
736 class2 (Ref 1), 61,097 particles; class3 (Ref 2), 553,368 particles; class4 (Ref 2),  
737 554,581 particles; class5 (Ref 3), 42,114 particles; class6 (Ref 3), 55,424  
738 particles. Curated particles from class3 and class4 were combined, re-extracted  
739 with a box size of 320 px, and further classified using Ref 2 as a 3D template for  
740 cryoSPARC Heterogeneous Refinement (N=4). Classes from this round of  
741 Heterogeneous Refinement (N=4) were as follows: class1 (Ref 2), 871,163  
742 particles; class2 (Ref 2), 77,769 particles; class3 (Ref 2), 61,489 particles; class4  
743 (Ref 2), 64,026 particles. Particles from class1 and class2 were combined and  
744 further sorted using Heterogeneous Refinement (N=4) using class maps as  
745 templates, resulting in the following: class1, 134,536 particles; class2, 270,170  
746 particles; class3, 294,162 particles; class4, 172,295 particles. Classification  
747 revealed two unique classes: nsp13<sub>1</sub>-BTC (class1 and class2) and nsp13<sub>2</sub>-BTC  
748 (class3 and class4). Particles within each class were further processed using  
749 RELION 3.1-beta Bayesian Polishing(9, 10). Polished particles were refined  
750 using cryoSPARC Non-uniform Refinement, resulting in structures with the

751 following particle counts and nominal resolutions: nsp13<sub>1</sub>-BTC (404,706 particles;  
752 3.40 Å) and nsp13<sub>2</sub>-BTC (466,457 particles; 3.45 Å).

753 To improve the resolution of the RNA in the BTC, particles from both classes  
754 were combined in a cryoSPARC Non-uniform Refinement and density  
755 corresponding to nsp13 was subtracted. Subtracted particles were further refined  
756 with cryoSPARC Local Refinement using a mask encompassing the BTC and a  
757 fulcrum point defined on the backtracked RNA. This map, BTC<sub>5</sub>(local), contained  
758 871,163 particles with a nominal resolution of 3.23 Å.

759 To improve the density of nsp13.2 in the nsp13<sub>2</sub>-BTC map, particles were  
760 subtracted using a mask defined around nsp13.2, leaving residual signal for only  
761 nsp13.2. Subtracted particles were classified (N=4) in RELION 3.1 beta using a  
762 mask around nsp13.2, resulting in the following classes: class1, 71,607 particles;  
763 class2, 163,540 particles; class3, 176,461 particles; class4, 54,849 particles.  
764 Subtracted particles in class1 and class2 were combined and reverted back to  
765 the original particles, followed by refinement using cryoSPARC Non-uniform  
766 Refinement. The resulting map of nsp13<sub>2</sub>-BTC contains 235,147 particles with  
767 nominal resolution of 3.59 Å. Local resolution calculations were generated using  
768 blocres and blocfilt from the Bsoft package (11).

769

770 **Model building and refinement.** Initial models were derived from PDB: 6XEZ  
771 (1). The models were manually fit into the cryo-EM density maps using Chimera  
772 (12) and rigid-body and real-space refined using Phenix real\_space\_refine (13).  
773 For real-space refinement, rigid body refinement was followed by all-atom and B-  
774 factor refinement with Ramachandran and secondary structure restraints. Models  
775 were inspected and modified in Coot (14).

776

777 **4-thiouridine crosslinking.** Nsp12 or nsp12-D760A were incubated with 3-fold  
778 molar excess of nsp7/8 to assemble holo-RdRp (2 µM final) in transcription  
779 buffer. The resulting holo-RdRp was added to a modified RNA scaffold



780 (SI Appendix; Fig. S5A) containing a photoactivable 4-thiouridine base (Horizon  
781 Discovery) which was 5'-labelled by T4-polynucleotide kinase (New England  
782 Biolabs) with  $\gamma$ -<sup>32</sup>P-ATP (Perkin-Elmer). The holo-RdRp/RNA complex was left to  
783 incubate for 5 minutes at 30°C in the dark. Nsp13 and ATP were added to a final  
784 concentration of 2  $\mu$ M and 2 mM, respectively, and incubated for five minutes at  
785 30°C in the dark. The reaction mixture was transferred to a Parafilm covered  
786 aluminum block at 4°C and irradiated with a 365-nm handheld UV lamp.  
787 Reactions were quenched with LDS sample loading buffer (ThermoFisher  
788 Scientific) and analyzed by gel electrophoresis on a NuPAGE 4-12% Bis-Tris gel  
789 (ThermoFisher) at 150 Volts for 1 hour and visualized by autoradiography.

790

## 791 **Molecular dynamics simulations**

792 *General simulation setup and parameterization.* Proteins, ADP, and ions were  
793 parameterized with the DES-Amber SF1.0 force field (15). RNAs were  
794 parameterized with the Amber ff14 RNA force field (16) with modified  
795 electrostatic, van der Waals, and torsional parameters to more accurately  
796 reproduce the energetics of nucleobase stacking (17). The systems were  
797 solvated with water parameterized with the TIP4P-D water model (18) and  
798 neutralized with 150 mM NaCl buffer. The systems each contained ~887,000  
799 atoms in a 190×190×190 Å cubic box.

800 Systems were first equilibrated on GPU Desmond using a mixed NVT/NPT  
801 schedule (19), followed by a 1  $\mu$ s relaxation simulation on Anton, a special-  
802 purpose machine for molecular dynamics simulations (20). All production  
803 simulations were performed on Anton and initiated from the last frame of the  
804 relaxation simulation. Production simulations were performed in the NPT  
805 ensemble at 310 K using the Martyna-Tobias-Klein barostat (21). The simulation  
806 time step was 2.5 fs, and a modified r-RESPA integrator (22, 23) was used in  
807 which long-range electrostatic interactions were evaluated every three time  
808 steps. Electrostatic forces were calculated using the *u*-series method (24). A 9-Å  
809 cutoff was applied for the van der Waals calculations.



810 *System preparation.* The nsp13<sub>2</sub>-BTC<sub>-1U+1C</sub> and the nsp13<sub>2</sub>-BTC<sub>-1U+1U</sub> complexes  
811 were prepared from the cryo-EM structure of the nsp13<sub>2</sub>-BTC<sub>5</sub>. AIF<sub>3</sub> and  
812 CHAPSO were removed. Cytosines at the +2 and +3 positions of the p-RNA  
813 were removed, and the cytosine at -1 was mutated to uracil. The resulting p-  
814 RNA had a matched -1U and a mismatched +1C in nsp13<sub>2</sub>-BTC<sub>-1U+1C</sub>, and a  
815 matched -1U and +1U in nsp13<sub>2</sub>-BTC<sub>-1U+1U</sub>. Missing loops and termini in  
816 proteins were capped with ACE/NME capping groups. The two complexes were  
817 prepared for simulation using the Protein Preparation Wizard in Schrödinger  
818 Maestro. After a 1 μs relaxation simulation of the nsp13<sub>2</sub>-BTC<sub>-1U+1C</sub> complex, the  
819 -1U of the p-RNA formed a Watson-Crick base pair with the -1A in the t-RNA,  
820 and the +1C of p-RNA formed a non-Watson-Crick C-A hydrogen bond with the  
821 +1A of the t-RNA in the active site. After a 1 μs relaxation simulation of the  
822 nsp13<sub>2</sub>-BTC<sub>-1U+1U</sub> complex, the -1U and +1U of the p-RNA formed Watson-Crick  
823 base pairs with the -1A and +1A of the t-RNA respectively.

824 *Simulation analysis.* All simulations were visually inspected using the in-house  
825 visualization software Firefly. The average root-mean-square deviation (RMSD)  
826 was calculated for +1C (or +1U) of the p-RNA between the last frame of the 1 μs  
827 relaxation simulation and instantaneous structures from the trajectories, aligned  
828 on the entire nps12 module.

829

830 **Quantification and statistical analysis.** The nMS spectra were visualized using  
831 Thermo Xcalibur Qual Browser (versions 3.0.63 and 4.2.27), deconvolved using  
832 UniDec versions 3.2 and 4.1 (3, 4) and plotted using the m/z software  
833 (Proteometrics LLC, New York, NY). Experimental masses (SI Appendix;  
834 Fig. S1B and C) were reported as the average mass ± standard deviation across  
835 all the calculated mass values obtained within the observed charge state  
836 distribution.

837 The local resolution of the cryo-EM maps (SI Appendix; Fig. S3B-D) was  
838 estimated using blocres (11) with the following parameters: box size 15, sampling  
839 1.1, and cutoff 0.5. Directional 3D FSC (SI Appendix; Fig. S3H-J) were calculated

840 by 3DFSC (25). The quantification and statistical analyses for model refinement  
841 and validation were generated using MolProbity (26) and PHENIX (13).

842

843

844

845

846

847

848

849

850

851

852

853

854

855

856

857

858

859

860

861 **Table S1. Cryo-EM data collection, refinement, and validation statistics.**

862

|                                                     | <b>nsp7/8/12/13/BTC_scaffold/ADP-AIF<sub>3</sub>/CHAPSO</b> |                         |             |
|-----------------------------------------------------|-------------------------------------------------------------|-------------------------|-------------|
| <b>Sample ID</b>                                    | nsp13 <sub>1</sub> -BTC                                     | nsp13 <sub>2</sub> -BTC | BTC (local) |
| <b>EMDB</b>                                         | EMD-23007                                                   | EMD-23008               | EMD-23009   |
| <b>PDB</b>                                          | 7KRN                                                        | 7KRO                    | 7KRP        |
| <b>Data collection and processing</b>               |                                                             |                         |             |
| Microscope                                          |                                                             | TFS Titan Krios         |             |
| Voltage (kV)                                        |                                                             | 300                     |             |
| Detector                                            |                                                             | Gatan K3 Camera         |             |
| Electron exposure (e <sup>-</sup> /Å <sup>2</sup> ) |                                                             | 66                      |             |
| Defocus range (μm)                                  |                                                             | -0.8 to -2.5            |             |
| Data collection mode                                |                                                             | Counting Mode           |             |
| Nominal Magnification                               |                                                             | 81,000x                 |             |
| Pixel size (Å)                                      |                                                             | 1.065                   |             |
| Symmetry imposed                                    |                                                             | C1                      |             |
| Initial particle images (no.)                       |                                                             | 4,961,691               |             |
| Final particle images (no.)                         | 404,706                                                     | 235,147                 | 871,163     |
| Map resolution (Å) - FSC threshold 0.143            | 3.40                                                        | 3.59                    | 3.23        |
| Map resolution range (Å)                            | 2.5-5.0                                                     | 2.5-5.0                 | 2.5-5.1     |
| <b>Refinement</b>                                   |                                                             |                         |             |
| Initial model used (PDB code)                       | 6XEZ                                                        | 6XEZ                    | 6XEZ        |
| Map sharpening B factor (Å <sup>2</sup> )           | -139.6                                                      | -127.6                  | -103.9      |

|                             |                                                                                  |                                                                                  |                                                              |
|-----------------------------|----------------------------------------------------------------------------------|----------------------------------------------------------------------------------|--------------------------------------------------------------|
| Model composition           |                                                                                  |                                                                                  |                                                              |
| Non-hydrogen atoms          | 17351                                                                            | 21988                                                                            | 12561                                                        |
| Protein residues            | 1963                                                                             | 2553                                                                             | 1373                                                         |
| Nucleic acid residues       | 80                                                                               | 80                                                                               | 73                                                           |
| Ligands                     | 5 Zn <sup>2+</sup> , 2 Mg <sup>2+</sup> , 3 CHAPSO,<br>2 ADP, 1 AlF <sub>3</sub> | 8 Zn <sup>2+</sup> , 3 Mg <sup>2+</sup> , 3 CHAPSO,<br>3 ADP, 2 AlF <sub>3</sub> | 2 Zn <sup>2+</sup> , 1 Mg <sup>2+</sup> , 3 CHAPSO,<br>1 ADP |
| B factors (Å <sup>2</sup> ) |                                                                                  |                                                                                  |                                                              |
| Protein                     | 45.65                                                                            | 74.56                                                                            | 38.31                                                        |
| Nucleic acid                | 128.79                                                                           | 163.6                                                                            | 140.77                                                       |
| Ligands                     | 59.03                                                                            | 78.99                                                                            | 46.55                                                        |
| R.m.s. deviations           |                                                                                  |                                                                                  |                                                              |
| Bond lengths (Å)            | 0.007                                                                            | 0.007                                                                            | 0.004                                                        |
| Bond angles (°)             | 0.711                                                                            | 0.735                                                                            | 0.609                                                        |
| Validation                  |                                                                                  |                                                                                  |                                                              |
| MolProbity score            | 2.66                                                                             | 2.68                                                                             | 1.97                                                         |
| Clashscore                  | 9.18                                                                             | 8.96                                                                             | 6.12                                                         |
| Poor rotamers (%)           | 7.54                                                                             | 9.4                                                                              | 4.18                                                         |
| Ramachandran plot           |                                                                                  |                                                                                  |                                                              |
| Favored (%)                 | 91.4                                                                             | 92.76                                                                            | 97.07                                                        |
| Allowed (%)                 | 8.6                                                                              | 6.93                                                                             | 2.93                                                         |
| Disallowed (%)              | 0                                                                                | 0.31                                                                             | 0                                                            |

863

864

865 **SUPPLEMENTAL FIGURES**

866

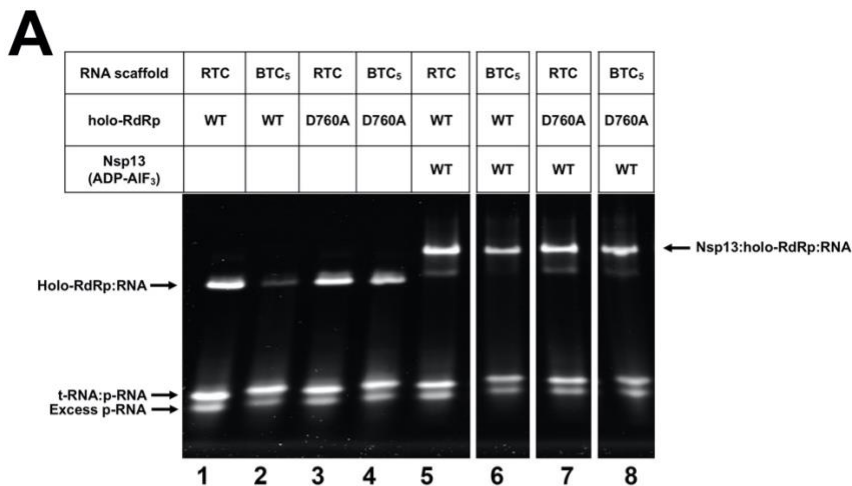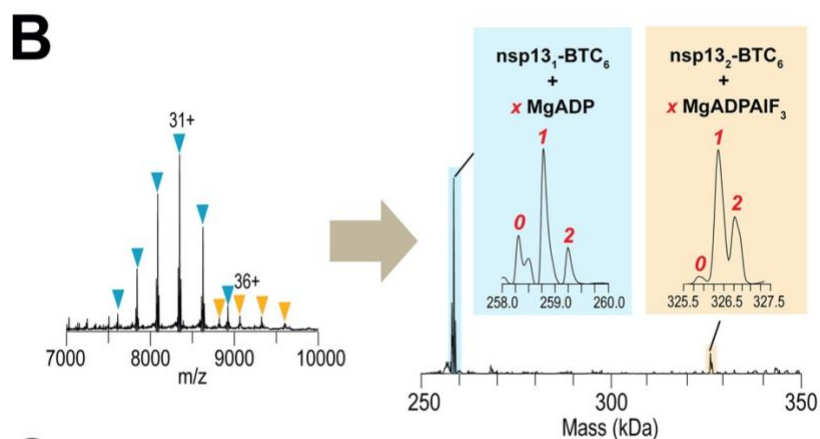

**C** Mass assignments from nMS analysis of BTC<sub>6</sub> incubated with nsp13 and MgADPAIF<sub>3</sub>

| Protein Assembly                                               | Measured Mass ± SD (Da)* | Expected Mass (Da) | Δ Mass (Da) | % Mass Error |
|----------------------------------------------------------------|--------------------------|--------------------|-------------|--------------|
| nsp13 <sub>1</sub> -BTC <sub>6</sub>                           | 258,307 ± 2              | 258,264            | 42          | 0.02         |
| nsp13 <sub>1</sub> -BTC <sub>6</sub> + 1 MgADP                 | 258,782 ± 3              | 258,716            | 66          | 0.03         |
| nsp13 <sub>1</sub> -BTC <sub>6</sub> + 2 MgADP                 | 259,246 ± 4              | 259,167            | 78          | 0.03         |
| nsp13 <sub>2</sub> -BTC <sub>6</sub>                           | 325,844 ± 34             | 325,729            | 116         | 0.04         |
| nsp13 <sub>2</sub> -BTC <sub>6</sub> + 1 MgADPAIF <sub>3</sub> | 326,342 ± 18             | 326,264            | 78          | 0.02         |
| nsp13 <sub>2</sub> -BTC <sub>6</sub> + 2 MgADPAIF <sub>3</sub> | 326,776 ± 17             | 326,716            | 60          | 0.02         |

\* Calculated from the average and S.D. of all the measured masses across the charge-state distribution ( $n \geq 4$ ).

867

**Figure S1**

868 **Fig. S1. Native gel electrophoresis mobility shift assay and nMS analysis of the**  
869 **BTC.**

870 **A.** A native gel electrophoretic mobility shift assay reveals that wt-holo-RdRp requires  
871 nsp13(ADP-AIF<sub>3</sub>) to bind the BTC<sub>5</sub>-scaffold efficiently (compare lanes 1, 2, and 6) but  
872 holo-RdRp with nsp12-D760A does not require nsp13 (lane 4).

873 **B.** The nMS spectrum and the deconvolved mass spectrum showing assembly of stable  
874 nsp13-BTC<sub>6</sub> complexes. The peak for the nsp13<sub>2</sub>-BTC<sub>6</sub> assembly is present at about  
875 ~9% intensity relative to the predominant peak from nsp13<sub>1</sub>-BTC<sub>6</sub>.

876 **C.** Mass assignments of the deconvolved peaks from the nMS analysis.

877

878

879

880

881

882

883

884

885

886

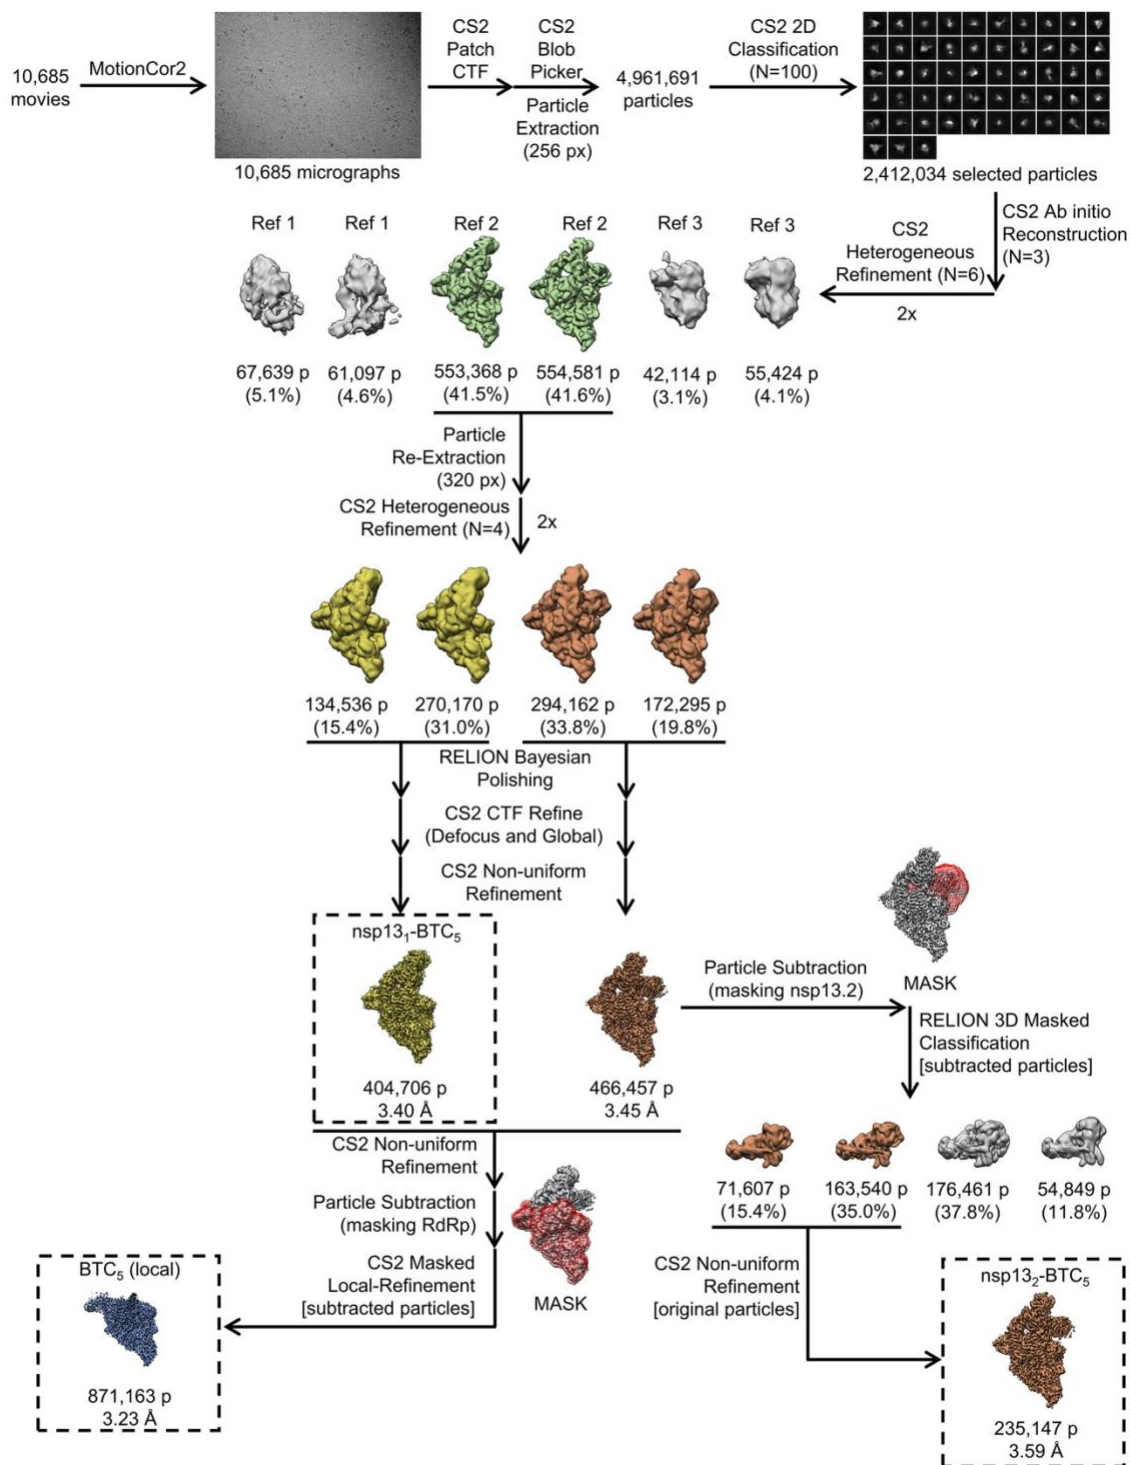

**Figure S2**

887

888 **Fig. S2. Cryo-EM processing pipeline.**



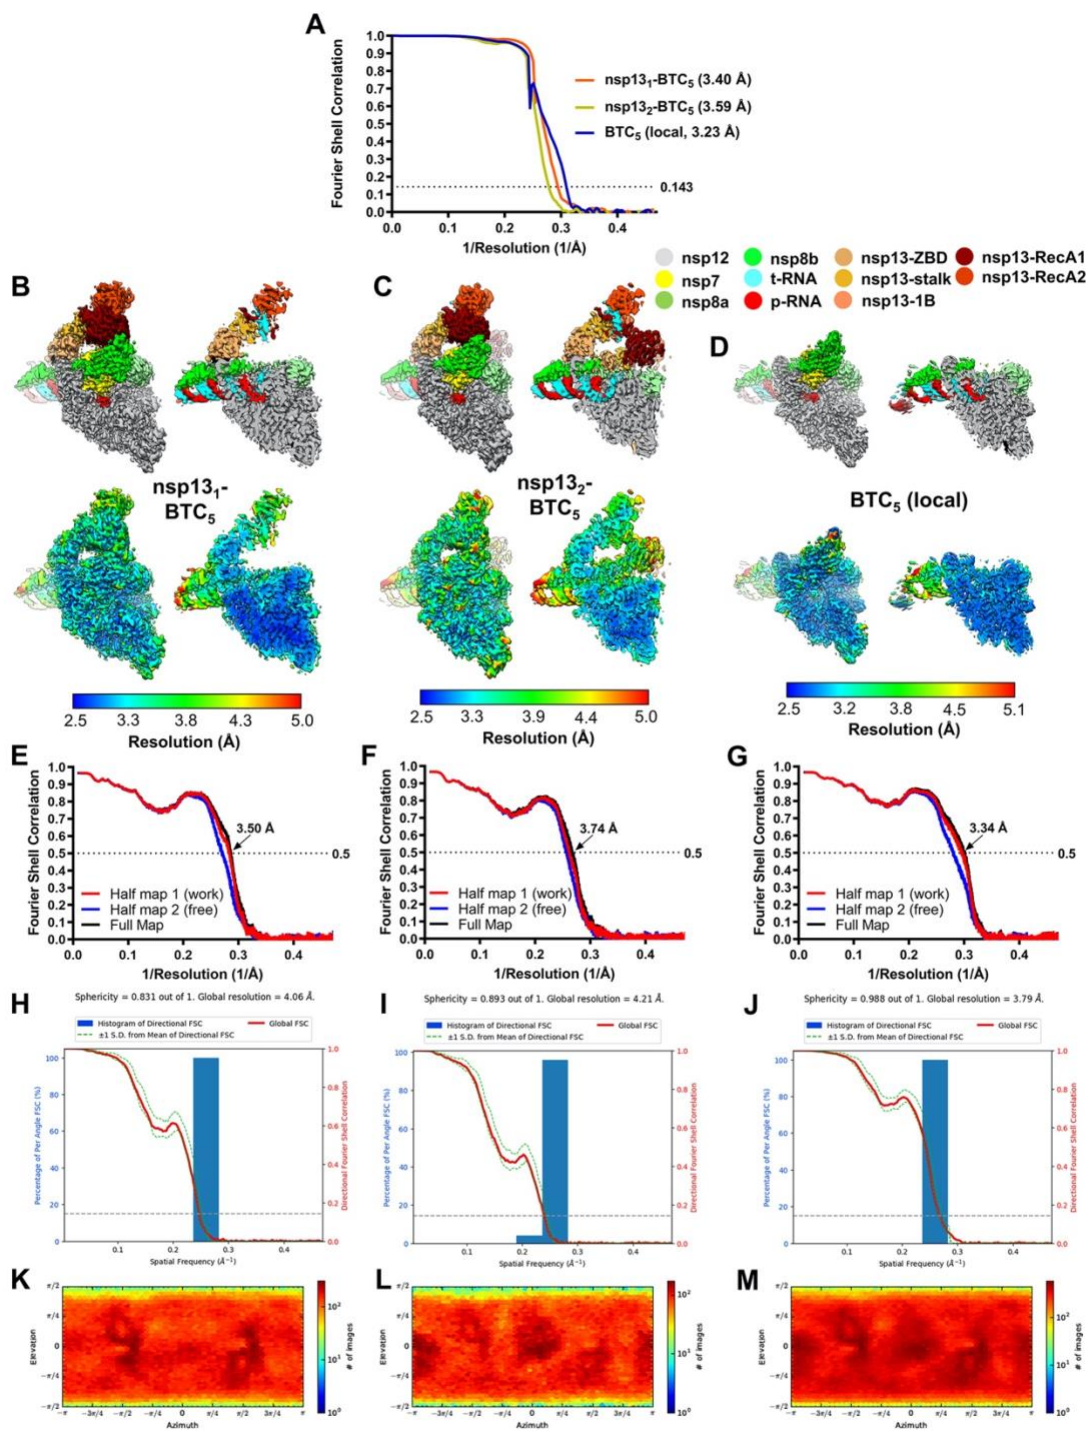

Figure S3

889  
890

891 **Fig. S3. Cryo-EM analysis.**

892 **A.** Gold-standard FSC plots for nsp13<sub>1</sub>-BTC<sub>5</sub>, nsp13<sub>2</sub>-BTC<sub>5</sub>, and BTC<sub>5</sub>(local), calculated  
893 by comparing two independently determined half-maps from cryoSPARC (8). The  
894 dotted line represents the 0.143 FSC cutoff.

895 **B-D.** Cryo-EM reconstructions filtered by local resolution(11). The view on the right is a  
896 cross-section.

897 (*top*) Colored by subunit according to the color key.

898 (*bottom*) Color by local resolution (key on the bottom).

899 **B.** Nsp13<sub>1</sub>-BTC<sub>5</sub>.

900 **C.** Nsp13<sub>2</sub>-BTC<sub>5</sub>.

901 **D.** BTC<sub>5</sub>(local).

902 **E – G.** FSC calculated between the refined structures and the half map used for  
903 refinement (work, red), the other half map (free, blue), and the full map (black).

904 **E.** Nsp13<sub>1</sub>-BTC<sub>5</sub>.

905 **F.** Nsp13<sub>2</sub>-BTC<sub>5</sub>.

906 **G.** BTC<sub>5</sub>(local).

907 **H - J,** Directional 3D Fourier shell correlation plots, calculated by 3DFSC(25).

908 **H.** Nsp13<sub>1</sub>-BTC<sub>5</sub>.

909 **I.** Nsp13<sub>2</sub>-BTC<sub>5</sub>.

910 **J.** BTC<sub>5</sub>(local).

911 **K – M.** Particle angular distribution plots calculated in cryoSPARC. Scale shows the  
912 number of particles assigned to a particular angular bin. Blue, a low number of particles;  
913 red, a high number of particles.

914 **K.** Nsp13<sub>1</sub>-BTC<sub>5</sub>.

915 **L.** Nsp13<sub>2</sub>-BTC<sub>5</sub>.

916 **M.** BTC<sub>5</sub>(local).

917

918

919

920

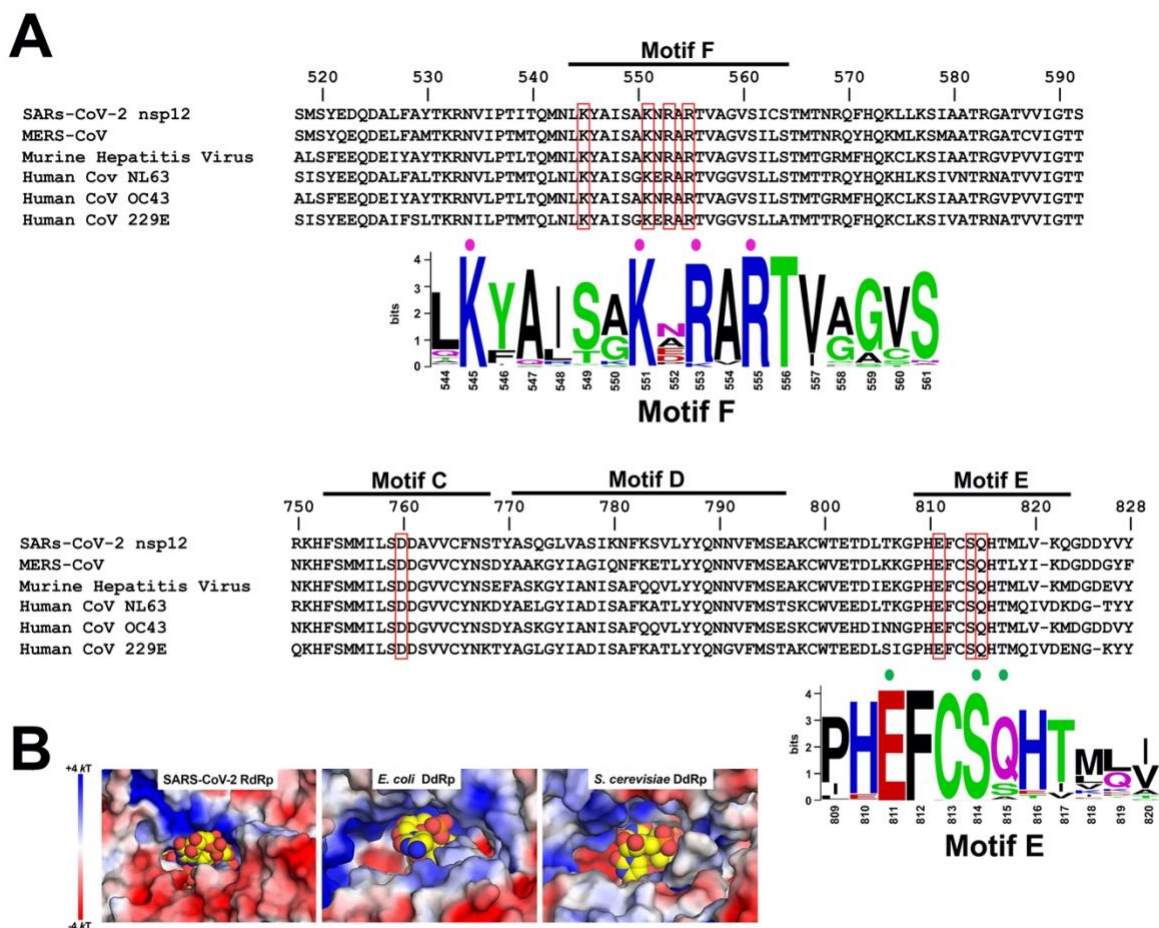

**Figure S4**

921 **Fig. S4. Sequence conservation of nsp12 homologs and NTP-entry tunnel**  
 922 **environment.**  
 923

924 **A.** Sequence alignment of nsp12 homologs from six pathogenic and model CoV family  
 925 members, covering RdRp motifs (27) (motifs F, C, D, and E denoted at the top of the  
 926 sequence alignment) architecturally important for the NTP-entry tunnel. Selected  
 927 residues discussed in the text are highlighted (red outlines). Sequence logos(28) for  
 928 motif F and motif E are shown, with residues that interact with the backtracked RNA  
 929 highlighted (colored dots above; see Figure 4). The sequence logos were generated  
 930 from an alignment of 97 RdRp sequences from  $\alpha$ -,  $\beta$ -,  $\gamma$ -, and  $\delta$ -CoVs (Data S1).

931 **B.** Views from the outside into the NTP-entry tunnels of the SARS-CoV-2 BTC (*left*), an  
 932 *E. coli* DdRp BTC [PDB ID: 6RI9; (29)] and an *S. cerevisiae* DdRp BTC [PDB ID: 3GTP;  
 933 (30)]. Protein surfaces are colored by the electrostatic surface potential [calculated  
 934 using APBS; (31)]. Backtracked RNA is shown as atomic spheres with yellow carbon  
 935 atoms.

936





939 **A.** Protein-RNA crosslinking analysis: The 5'-[<sup>32</sup>P]-labelled RTC(4-thio-U)-scaffold and  
940 the indicated proteins were incubated along with 2 mM ATP (present in every lane),  
941 exposed to UV as indicated, then analyzed by SDS polyacrylamide gel electrophoresis  
942 and autoradiography. The positions of nsp8, nsp12, and nsp13 bands are indicated.  
943 Lanes 1 and 5, containing nsp13 only, are identical controls indicating uniform UV  
944 exposure across the samples. Holo-RdRp(\*) denotes the nsp12-D760A substitution that  
945 facilitates backtracking (see Figure S1A). The two panels show the same SDS  
946 polyacrylamide gel (left panel, Coomassie stained; right panel, visualized by  
947 autoradiography).

948 **B.** Protein-RNA crosslinks are specific. Lanes 1, 2; Analysis using the 5'-[<sup>32</sup>P]-RTC(4-  
949 thio-U)-scaffold (RNA-scaffold 'a' shown on the bottom). Crosslinking to nsp12 serves  
950 as a positive control for the crosslinking reaction. Lanes 3-6; Analysis using RNA-  
951 scaffold 'b' (RTC-scaffold with 5'-[<sup>32</sup>P]-labelled p-RNA). Lanes 7-10: Analysis using  
952 RNA-scaffold 'c' (RTC-scaffold with 5'-[<sup>32</sup>P]-labelled t-RNA). The complete absence of  
953 protein-RNA crosslinks in lanes 3-10 indicates that the observed protein-RNA crosslinks  
954 arise from the 4-thio-U site-specifically incorporated in the p-RNA of the RTC(4-thio-U)-  
955 scaffold.

956

957

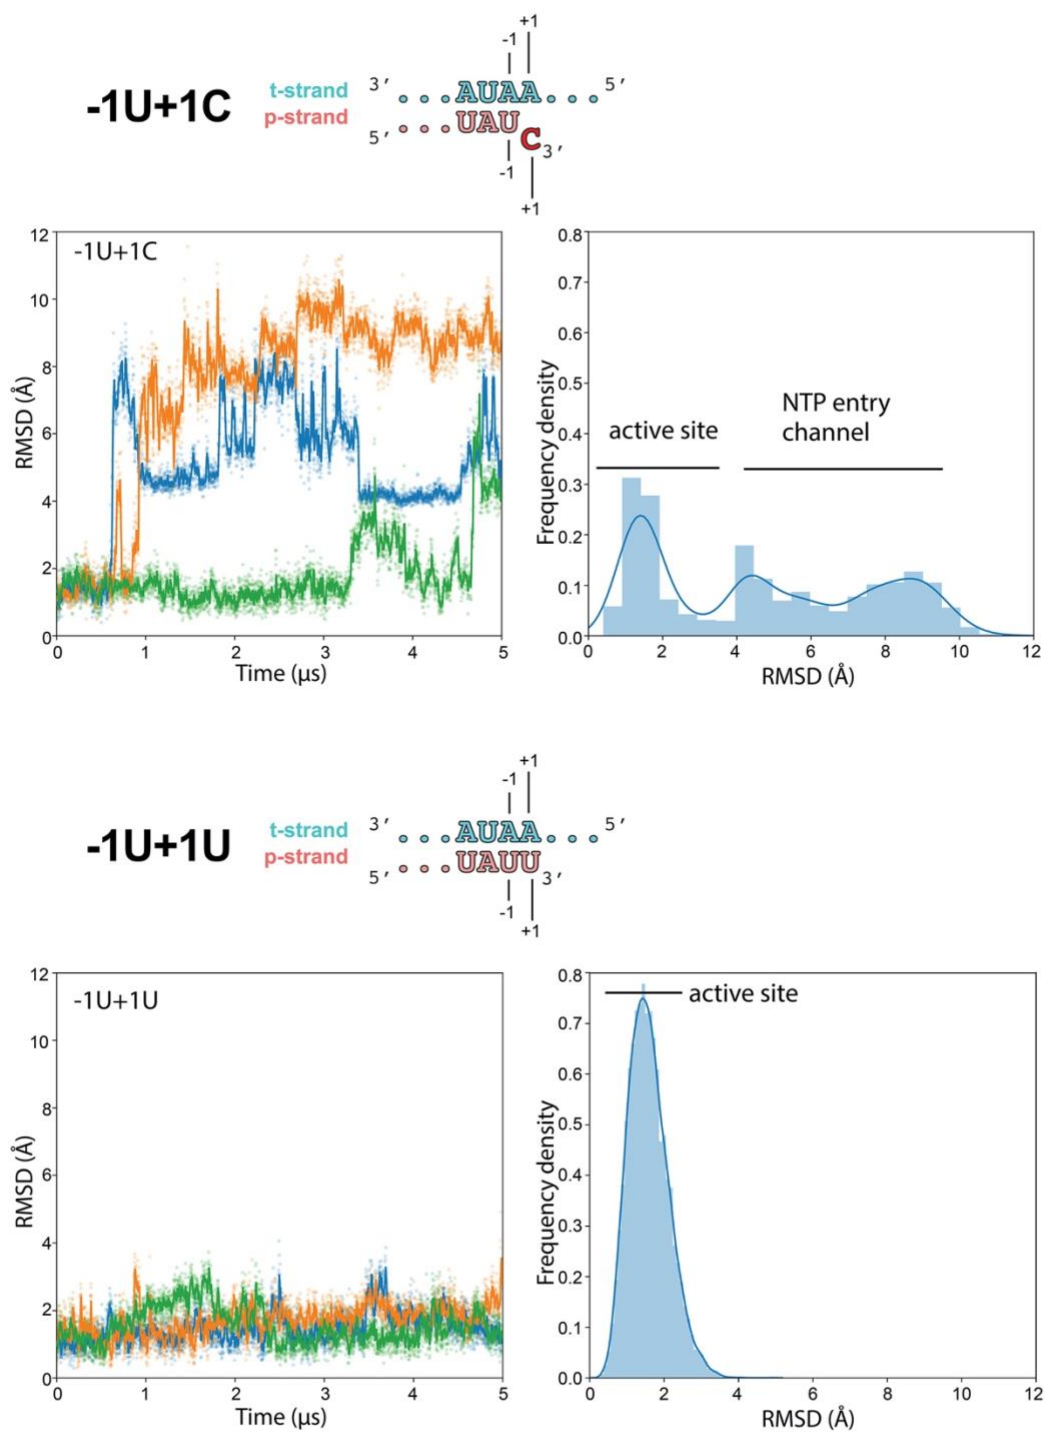

**Figure S6**

958  
959

960 **Fig. S6. Molecular dynamics simulations of nsp13<sub>2</sub>-BTC<sub>1U+1C</sub> vs.**  
961 **nsp13<sub>2</sub>-BTC<sub>1U+1U</sub>.**

962 Molecular dynamics simulations of the nsp13<sub>2</sub>-BTC<sub>1U+1C</sub> (*top*) and nsp13<sub>2</sub>-BTC<sub>1U+1U</sub>  
963 (*bottom*) complexes. The schematics illustrate the active-site proximal nucleotides in  
964 each modeled complex. Each complex was simulated with 3 replicates. RMSD values  
965 plotted as a function of time represent the heavy-atom RMSD of the +1 nucleotide of the  
966 p-RNA (+1C for nsp13<sub>2</sub>-BTC<sub>1U+1C</sub> or matched +1U for nsp13<sub>2</sub>-BTC<sub>1U+1U</sub>) compared with  
967 the starting configuration (see Methods). The RMSD histograms (plotted on the right)  
968 are aggregates of all 3 replicates.

969 (*top*) Nsp13<sub>2</sub>-BTC<sub>1U+1C</sub>. As shown in Figure 5C, the mismatched p-RNA +1C spends  
970 about 60% of the time frayed from the t-RNA +1A and near or in the NTP-entry tunnel  
971 (RMSD  $\geq$  ~3.5 Å).

972 (*bottom*) Nsp13<sub>2</sub>-BTC<sub>1U+1U</sub>. With the p-RNA +1U matched with the t-RNA +1A for  
973 Watson-Crick base pairing, the p-RNA +1U does not fray and spends all of its time in  
974 the vicinity of the RdRp active site and base paired with the t-RNA.

975

976

977

978

979

980

981

982

983

984

985



986 **SUPPLEMENTAL DATA FILES**

987

988 **Data File S1.** Sequence alignment (Clustal format) of  $\alpha$ - and  $\beta$ -CoV nsp12 sequences.

989

990

991

992

993

994 **SI References**

995

996 1. J. Chen, *et al.*, Structural basis for helicase-polymerase coupling in the SARS-CoV-2  
997 replication-transcription complex. *Cell* **182**, 1560-1573.e13 (2020).

998 2. P. D. B. Olinares, B. T. Chait, Methods in Molecular Biology. *Methods Mol Biology*  
999 *Clifton N J* **2062**, 357–382 (2019).

1000 3. D. J. Reid, *et al.*, High-Throughput Deconvolution of Native Mass Spectra. *J Am Soc*  
1001 *Mass Spectrom* **30**, 118–127 (2019).

1002 4. M. T. Marty, *et al.*, Bayesian deconvolution of mass and ion mobility spectra: from  
1003 binary interactions to polydisperse ensembles. *Analytical chemistry* **87**, 4370–4376  
1004 (2015).

1005 5. A. Morin, *et al.*, Collaboration gets the most out of software. *eLife* **2**, e01456 (2013).

1006 6. C. Suloway, *et al.*, Automated molecular microscopy: the new Legimon system.  
1007 *Journal of structural biology* **151**, 41–60 (2005).

1008 7. S. Q. Zheng, *et al.*, MotionCor2: anisotropic correction of beam-induced motion for  
1009 improved cryo-electron microscopy. *Nature methods* **14**, 331–332 (2017).

1010 8. A. Punjani, J. L. Rubinstein, D. J. Fleet, M. A. Brubaker, cryoSPARC: algorithms for  
1011 rapid unsupervised cryo-EM structure determination. *Nat Methods* **14**, 290–296 (2017).

1012 9. S. H. W. Scheres, RELION: implementation of a Bayesian approach to cryo-EM  
1013 structure determination. *Journal of structural biology* **180**, 519–530 (2012).

- 1014 10. J. Zivanov, *et al.*, New tools for automated high-resolution cryo-EM structure  
1015 determination in RELION-3. *eLife* **7** (2018).
- 1016 11. G. Cardone, J. B. Heymann, A. C. Steven, One number does not fit all: mapping  
1017 local variations in resolution in cryo-EM reconstructions. *Journal of structural biology*  
1018 **184**, 226–236 (2013).
- 1019 12. E. F. Pettersen, *et al.*, UCSF Chimera--a visualization system for exploratory  
1020 research and analysis. *Journal of computational chemistry* **25**, 1605–1612 (2004).
- 1021 13. P. D. Adams, *et al.*, PHENIX: a comprehensive Python-based system for  
1022 macromolecular structure solution. *Acta Crystallographica Section D Biological*  
1023 *Crystallography* **66**, 213–221 (2010).
- 1024 14. P. Emsley, K. Cowtan, Coot: model-building tools for molecular graphics. *Acta*  
1025 *Crystallographica Section D Biological Crystallography* **60**, 2126–2132 (2004).
- 1026 15. S. Piana, P. Robustelli, D. Tan, S. Chen, D. E. Shaw, Development of a Force Field  
1027 for the Simulation of Single-Chain Proteins and Protein–Protein Complexes. *J Chem*  
1028 *Theory Comput* **16**, 2494–2507 (2020).
- 1029 16. J. A. Maier, *et al.*, ff14SB: Improving the Accuracy of Protein Side Chain and  
1030 Backbone Parameters from ff99SB. *J Chem Theory Comput* **11**, 3696–3713.
- 1031 17. D. Tan, S. Piana, R. M. Dirks, D. E. Shaw, RNA force field with accuracy  
1032 comparable to state-of-the-art protein force fields. *Proc National Acad Sci* **115**,  
1033 201713027 (2018).
- 1034 18. S. Piana, A. G. Donchev, P. Robustelli, D. E. Shaw, Water Dispersion Interactions  
1035 Strongly Influence Simulated Structural Properties of Disordered Protein States. *J Phys*  
1036 *Chem B* **119**, 5113–5123 (2015).
- 1037 19. K. J. Bowers, *et al.*, Scalable Algorithms for Molecular Dynamics Simulations on  
1038 Commodity Clusters. *Acm Ieee Sc 2006 Conf Sc'06*, 43–43 (2006).
- 1039 20. D. E. Shaw, *et al.*, Anton 2: Raising the Bar for Performance and Programmability in  
1040 a Special-Purpose Molecular Dynamics Supercomputer. *Sc14 Int Conf High Perform*  
1041 *Comput Netw Storage Analysis*, 41–53 (2014).
- 1042 21. G. J. Martyna, D. J. Tobias, M. L. Klein, Constant pressure molecular dynamics  
1043 algorithms. *J Chem Phys* **101**, 4177–4189 (1994).
- 1044 22. C. Predescu, *et al.*, Computationally efficient molecular dynamics integrators with  
1045 improved sampling accuracy. *Mol Phys* **110**, 967–983 (2012).

- 1046 23. M. Tuckerman, B. J. Berne, G. J. Martyna, Reversible multiple time scale molecular  
1047 dynamics. *J Chem Phys* **97**, 1990–2001 (1992).
- 1048 24. C. Predescu, *et al.*, The u -series: A separable decomposition for electrostatics  
1049 computation with improved accuracy. *J Chem Phys* **152**, 084113 (2020).
- 1050 25. Y. Z. Tan, *et al.*, Addressing preferred specimen orientation in single-particle cryo-  
1051 EM through tilting. *Nature methods* **14**, 793–796 (2017).
- 1052 26. V. B. Chen, *et al.*, MolProbity: all-atom structure validation for macromolecular  
1053 crystallography. *Acta Crystallographica Section D Biological Crystallography* **66**, 12–21  
1054 (2010).
- 1055 27. A. J. W. te Velthuis, Common and unique features of viral RNA-dependent  
1056 polymerases. *Cell Mol Life Sci Cmls* **71**, 4403–20 (2014).
- 1057 28. T. D. Schneider, R. M. Stephens, Sequence logos: a new way to display consensus  
1058 sequences. *Nucleic Acids Research* **18**, 6097–6100 (1990).
- 1059 29. M. Abdelkareem, *et al.*, Structural Basis of Transcription: RNA Polymerase  
1060 Backtracking and Its Reactivation. *Mol Cell* **75**, 298-309.e4 (2019).
- 1061 30. D. Wang, *et al.*, Structural basis of transcription: backtracked RNA polymerase II at  
1062 3.4 angstrom resolution. *Science* **324**, 1203–1206 (2009).
- 1063 31. E. Jurrus, *et al.*, Improvements to the APBS biomolecular solvation software suite.  
1064 *Protein Sci* **27**, 112–128 (2018).
- 1065
- 1066
- 1067
- 1068
